# Supplementary material for: Nursing Regulation Literature in Canada: Protocol for a Scoping Review
Source: PubMed Central journal article supplement (PMC11316164; doi:10.2196/56163), 2024-07-26
Supplement: resprot_v13i1e56163_app5.pdf [file resprot_v13i1e56163_app5.pdf]

**Multimedia Appendix 5: Data Extraction Instrument**

| <b>ID</b> | <b>Author</b> | <b>Year</b> | <b>Type of publication</b>                                                                                       | <b>Purpose and Aim</b> | <b>Focus in relation to core regulatory functions</b>                                                                                                                                                                                                                                               | <b>Population</b>                                                                                                  | <b>Jurisdiction</b>                       | <b>Key findings or concepts</b> |
|-----------|---------------|-------------|------------------------------------------------------------------------------------------------------------------|------------------------|-----------------------------------------------------------------------------------------------------------------------------------------------------------------------------------------------------------------------------------------------------------------------------------------------------|--------------------------------------------------------------------------------------------------------------------|-------------------------------------------|---------------------------------|
|           |               |             | Quantitative<br>Qualitative<br>Commentaries and opinion papers<br>Discussion papers<br>Theses<br>Grey literature |                        | Education program approval and accreditation<br><br>Registration or licensure<br><br>Standards of practice or codes of ethics<br><br>Continuing competence<br><br>Discipline and conduct<br><br>Governance<br><br>Reform<br><br>Regulatory models<br><br>Trade and mobility agreements<br><br>Other | Registered Nurses<br><br>Licensed Practical Nurses<br><br>Registered Psychiatric Nurses<br><br>Nurse Practitioners | National<br><br>Provincial or territorial |                                 |
